# Supplementary material for: Historical and future changes in air pollutants from CMIP6 models
Source: Copernicus journal article supplement (doi:10.5194/acp-2019-1211), 2020-01-21
Supplement: Supplementary file 1 [file acp-2019-1211-supplement.pdf]

# Historical and future changes in air pollutants from CMIP6 models

Steven T. Turnock<sup>1</sup>, Robert J. Allen<sup>2</sup>, Martin Andrews<sup>1</sup>, Susanne E. Bauer<sup>3,4</sup>, Louisa Emmons<sup>5</sup>, Peter Good<sup>1</sup>, Larry Horowitz<sup>6</sup>, Martine Michou<sup>7</sup>, Pierre Nabat<sup>7</sup>, Vaishali Naik<sup>6</sup>, David Neubauer<sup>8</sup>, Fiona M. O'Connor<sup>1</sup>, Dirk Olivié<sup>9</sup>, Michael Schulz<sup>9</sup>, Alistair Sellar<sup>1</sup>, Toshihiko Takemura<sup>10</sup>, Simone Tilmes<sup>5</sup>,  
5 Kostas Tsigaridis<sup>3,4</sup>, Tongwen Wu<sup>11</sup>, Jie Zhang<sup>11</sup>

<sup>1</sup>Met Office Hadley Centre, Exeter, UK

<sup>2</sup>Department of Earth and Planetary Sciences, University of California Riverside, Riverside, California, USA

<sup>3</sup>Center for Climate Systems Research, Columbia University, New York, NY, USA

<sup>4</sup>NASA Goddard Institute for Space Studies, New York, NY, USA

10 <sup>5</sup>Atmospheric Chemistry Observations and Modelling Lab, National Center for Atmospheric Research, Boulder, CO, USA

<sup>6</sup>DOC/NOAA/OAR/Geophysical Fluid Dynamics Laboratory. Biogeochemistry, Atmospheric Chemistry, and Ecology Division, Princeton, USA

<sup>7</sup>Centre National de Recherches Météorologiques (CNRM), Université de Toulouse, Météo-France, CNRS, Toulouse, France

<sup>8</sup>Institute of Atmospheric and Climate Science, ETH Zurich, Zurich, Switzerland

15 <sup>9</sup>Division for Climate Modelling and Air Pollution, Norwegian Meteorological Institute, Oslo, Norway

<sup>10</sup>Research Institute for Applied Mechanics, Kyushu University, Fukuoka, Japan

<sup>11</sup>Beijing Climate Center, China Meteorological Administration, Beijing, China

*Correspondence to:* Steven Turnock (steven.turnock@metoffice.gov.uk)

## Supplementary Material

### 20 Contents

Figure S1 – Definition of Regions

Figures S2-S6 – Seasonal mean surface O<sub>3</sub> concentrations from individual CMIP6 models compared to observations

Figures S7-S11 – Annual mean PM<sub>2.5</sub> component concentrations in 2005-2014 across the individual CMIP6 models

25 Figure S12 – Annual and seasonal mean PM<sub>2.5</sub> NO<sub>3</sub> component concentrations in 2005-2014 across the individual CMIP6 models that made the data available

Figure S13 – Regional surface temperature response across CMIP6 models for Tier 1 future scenarios

Figure S14 – Global plots of surface O<sub>3</sub> response in ssp370 from 4 CMIP6 models

Figure S15 – Emissions of biogenic Volatile organic compounds across three CMIP6 models

Figure S16-S20 - Annual mean response of PM<sub>2.5</sub> component concentrations in ssp370 across four individual CMIP6 models

30

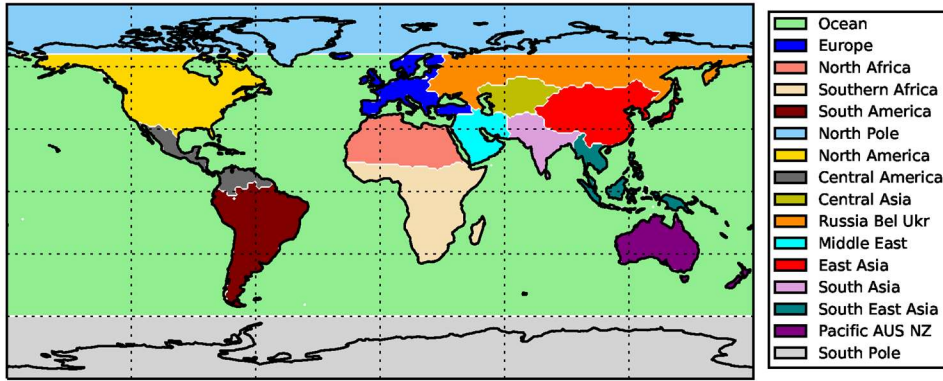

Figure S1 – Definition of regions used in the study, based on those used in Phase 2 of the Hemispheric Transport of Air Pollutants (HTAP2)

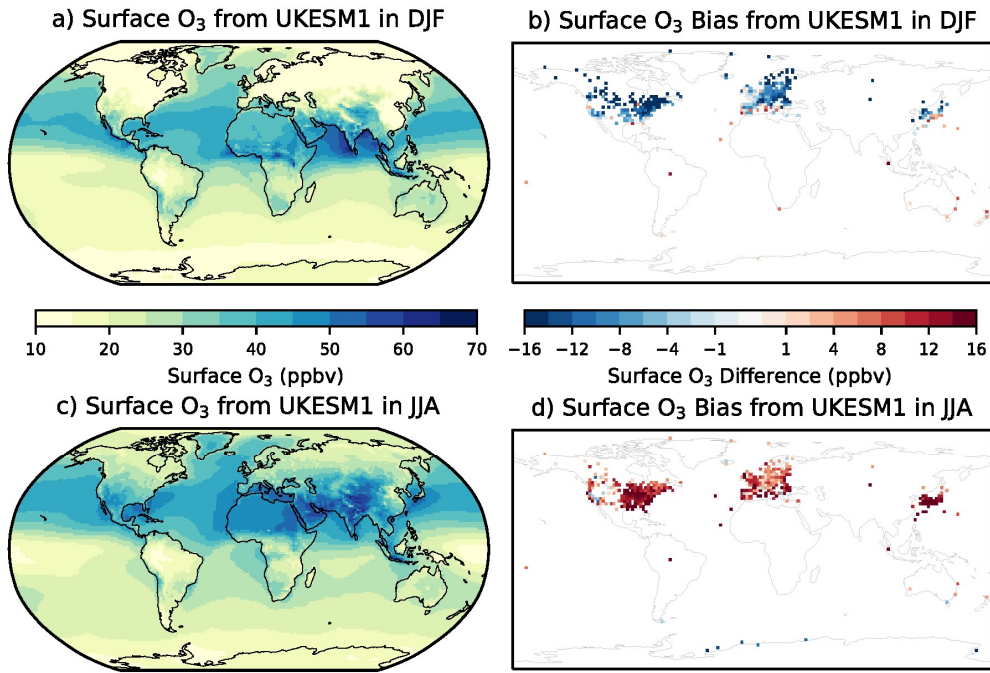

Figure S2 – Seasonal mean surface O<sub>3</sub> concentrations from UKESM1 in a) December January, February (DJF) and c) June, July, August (JJA) over the 2005-2014 period. Difference between the UKESM1 mean and TOAR observations for b) DJF and d) JJA.

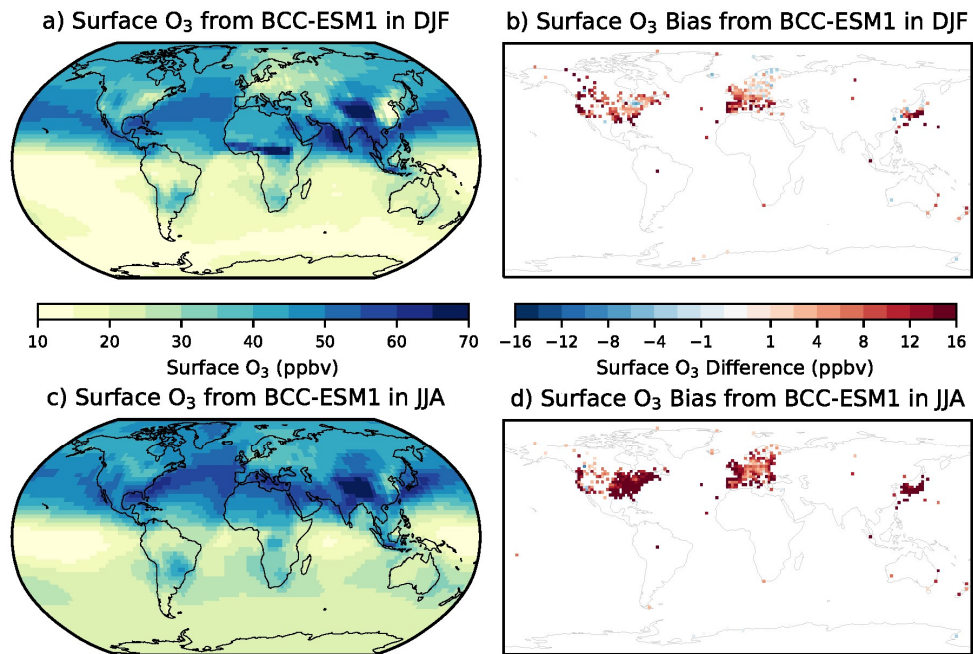

Figure S3 – Seasonal mean surface O<sub>3</sub> concentrations from BCC-ESM1 in a) December January, February (DJF) and c) June, July, August (JJA) over the 2005-2014 period. Difference between the BCC-ESM1 mean and TOAR observations for b) DJF and d) JJA.

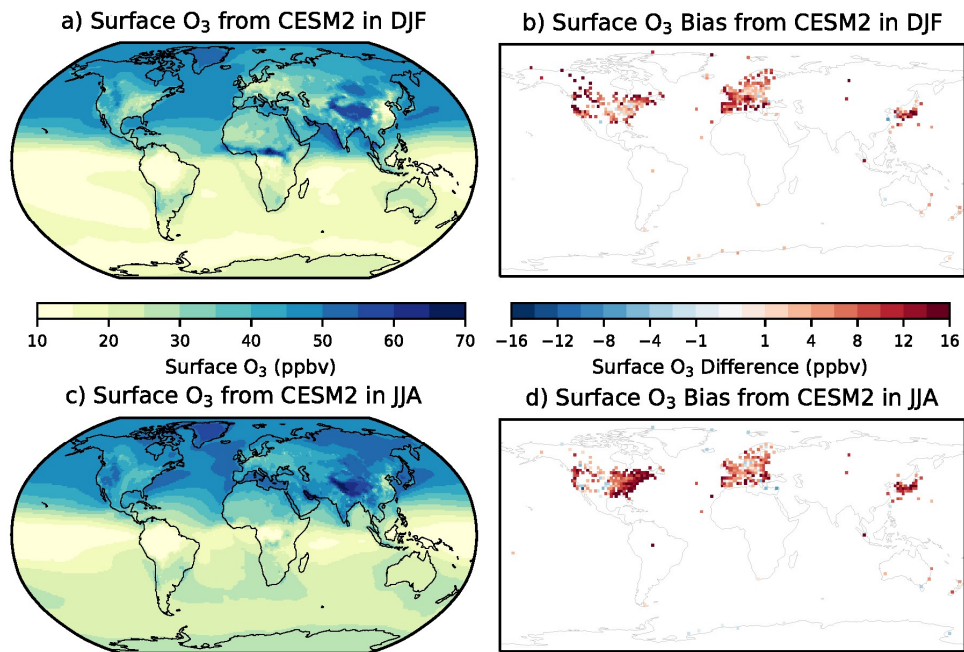

45 Figure S4 – Seasonal mean surface O<sub>3</sub> concentrations from CESM2 in a) December January, February (DJF) and c) June, July, August (JJA) over the 2005-2014 period. Difference between the CESM2 mean and TOAR observations for b) DJF and d) JJA.

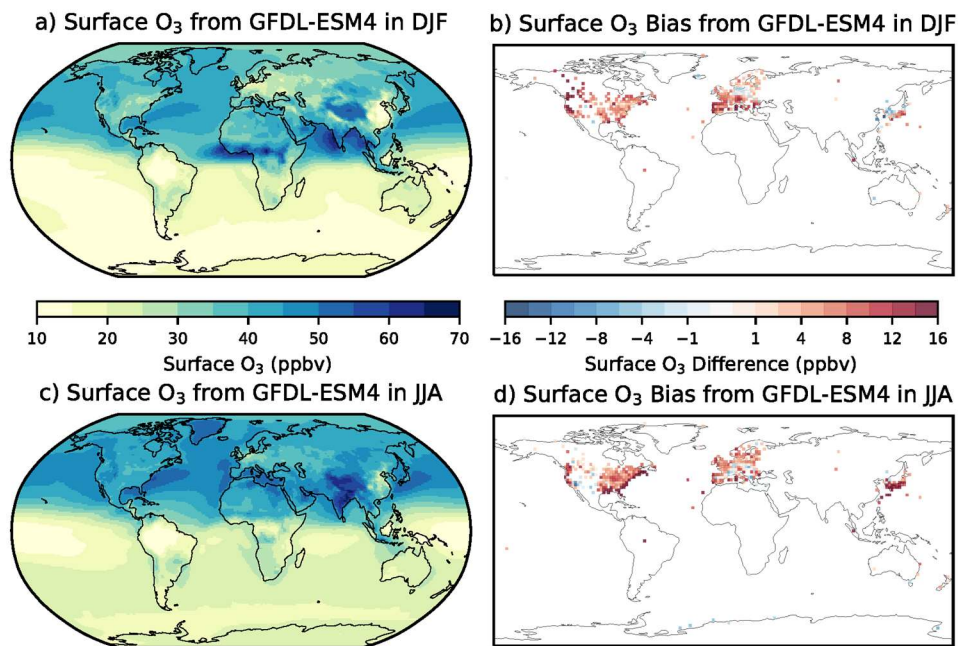

Figure S5 – Seasonal mean surface O<sub>3</sub> concentrations from GFDL-ESM4 in a) December January, February (DJF) and c) June, July, August (JJA) over the 2005-2014 period. Difference between the GFDL-ESM4 mean and TOAR observations for b) DJF and d) JJA.

50

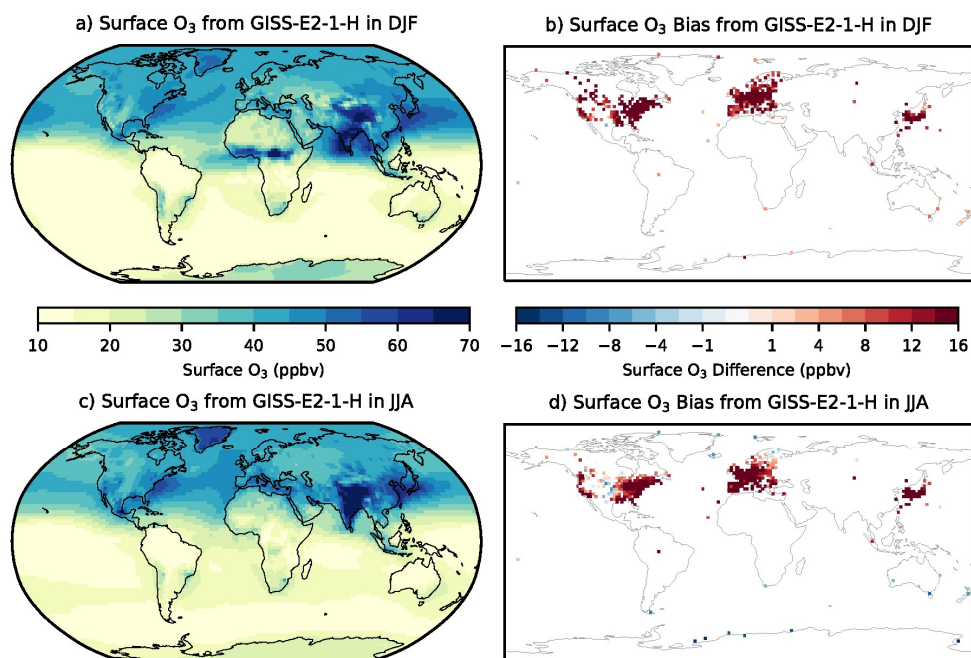

Figure S6 – Seasonal mean surface O<sub>3</sub> concentrations from GISS-E2-1-H in a) December January, February (DJF) and c) June, July, August (JJA) over the 2005-2014 period. Difference between the GISS-E2-1-H mean and TOAR observations for b) DJF and d) JJA.

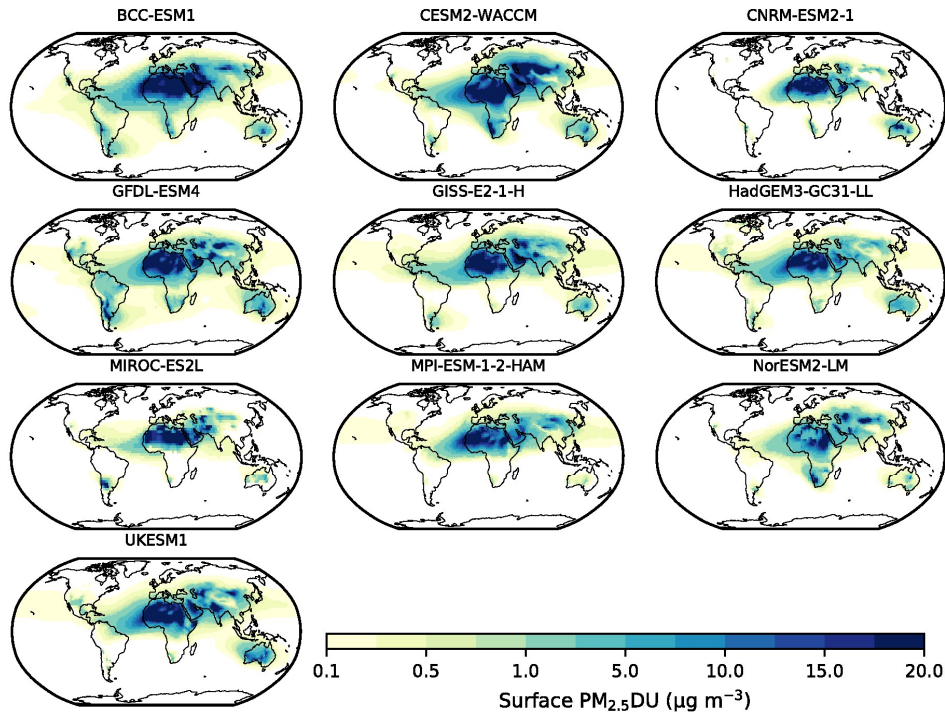

55

Figure S7 – Annual mean PM<sub>2.5</sub> dust component calculated for each individual CMIP6 model over the period 2005-2014

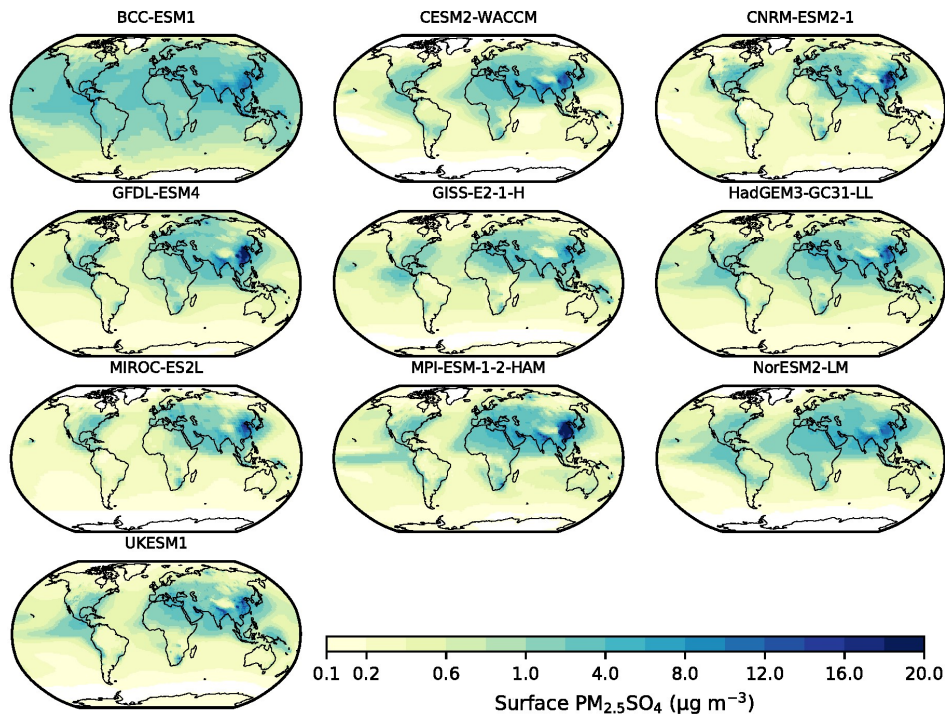

Figure S8 – Annual mean PM<sub>2.5</sub> SO<sub>4</sub> component calculated for each individual CMIP6 model over the period 2005-2014

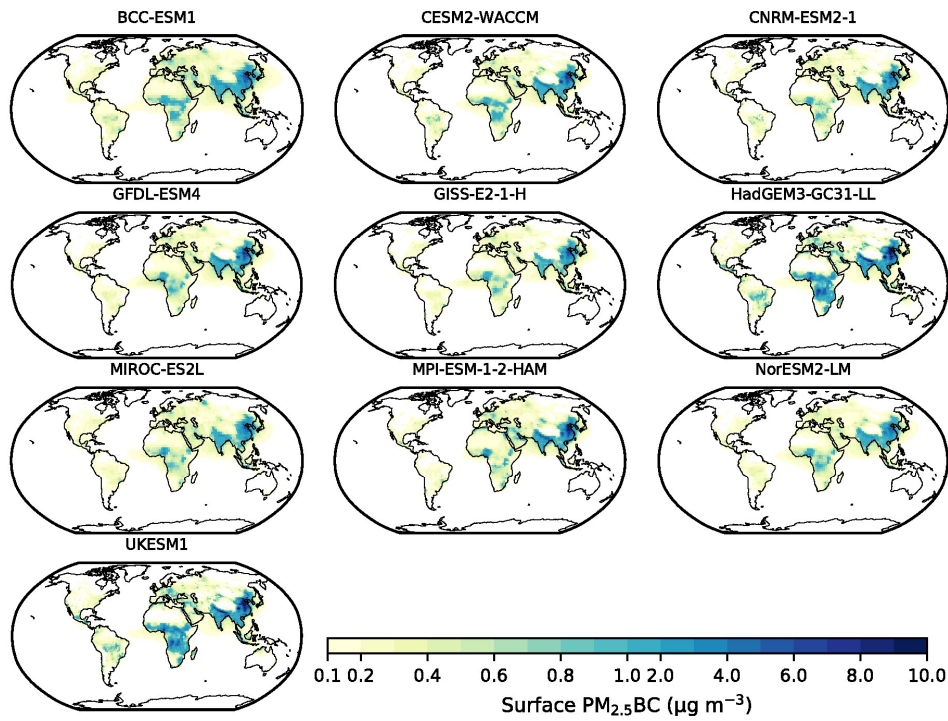

60 Figure S9 – Annual mean PM<sub>2.5</sub> BC component calculated for each individual CMIP6 model over the period 2005-2014

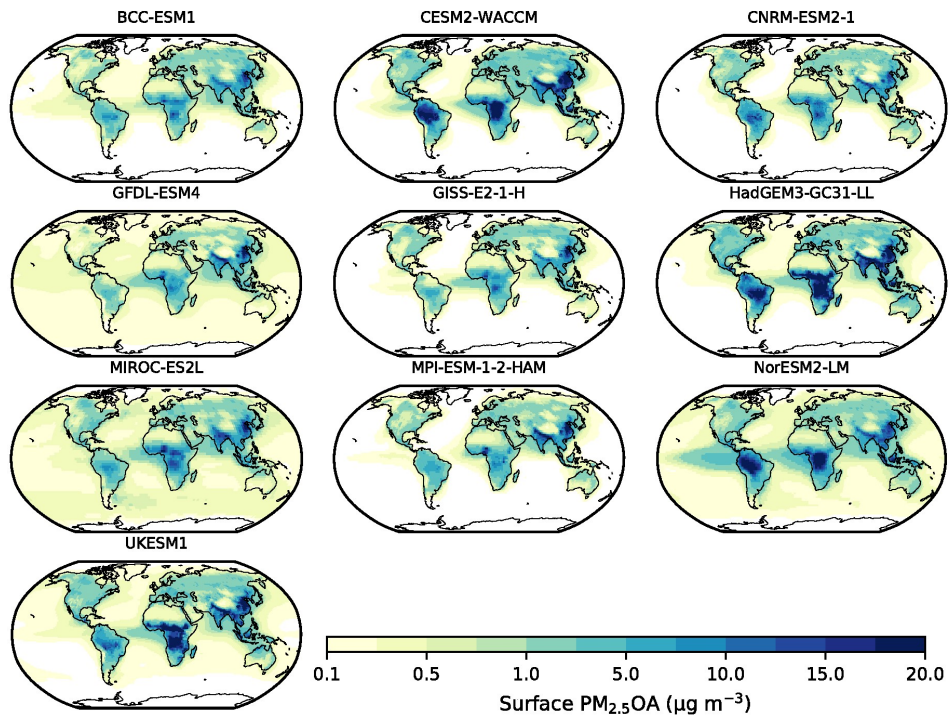

Figure S10 – Annual mean PM<sub>2.5</sub> OA component calculated for each individual CMIP6 model over the period 2005-2014

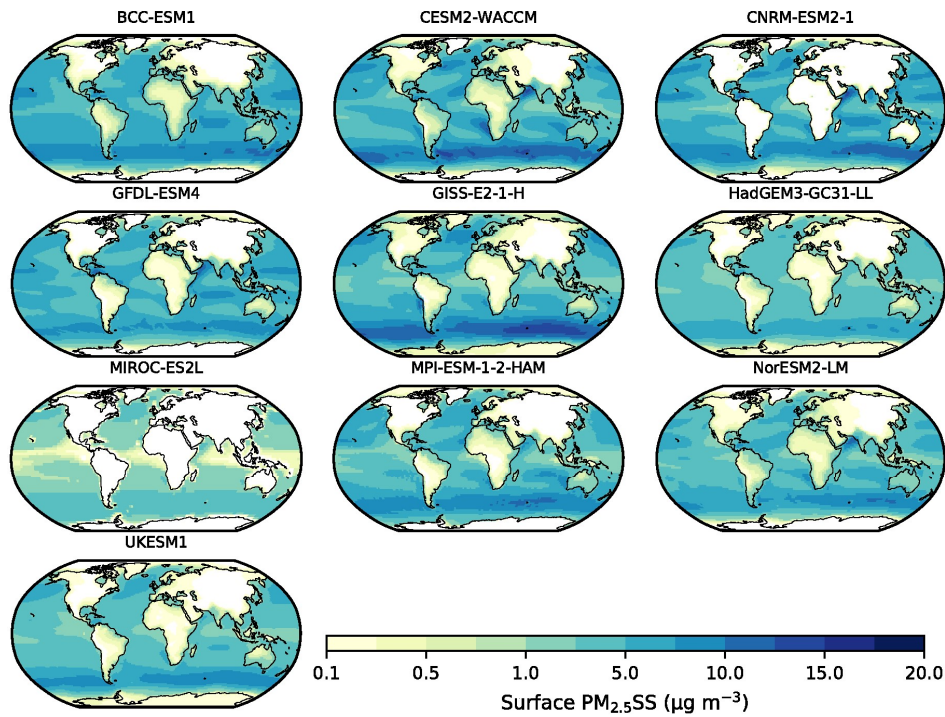

Figure S11 – Annual mean PM<sub>2.5</sub> SS component calculated for each individual CMIP6 model over the period 2005-2014

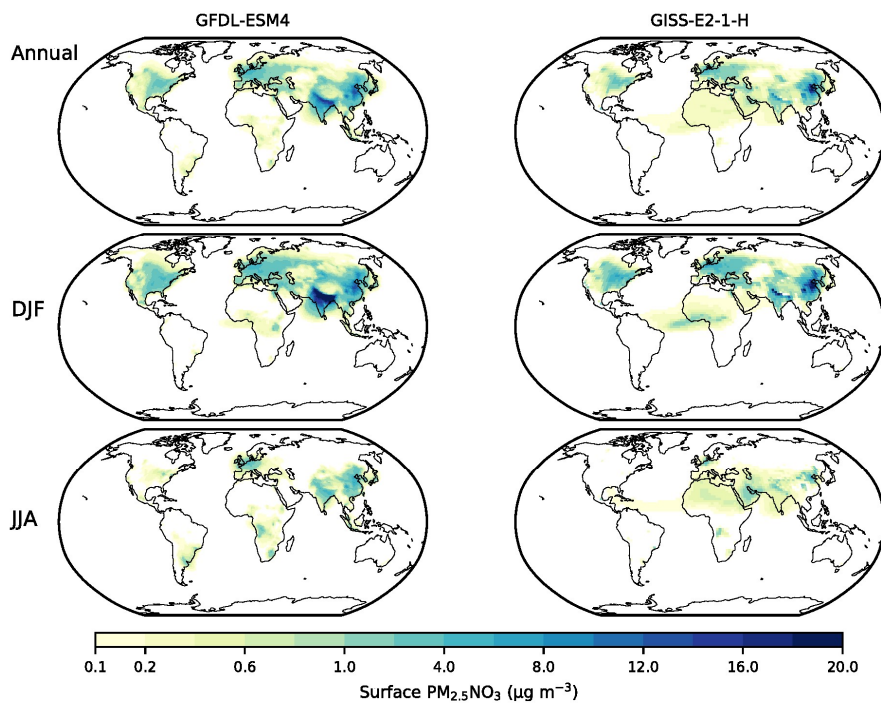

Figure S12 – Annual and seasonal mean PM<sub>2.5</sub> NO<sub>3</sub> (nitrate) component calculated for each individual CMIP6 model that made the data available over the period 2005-2014

65

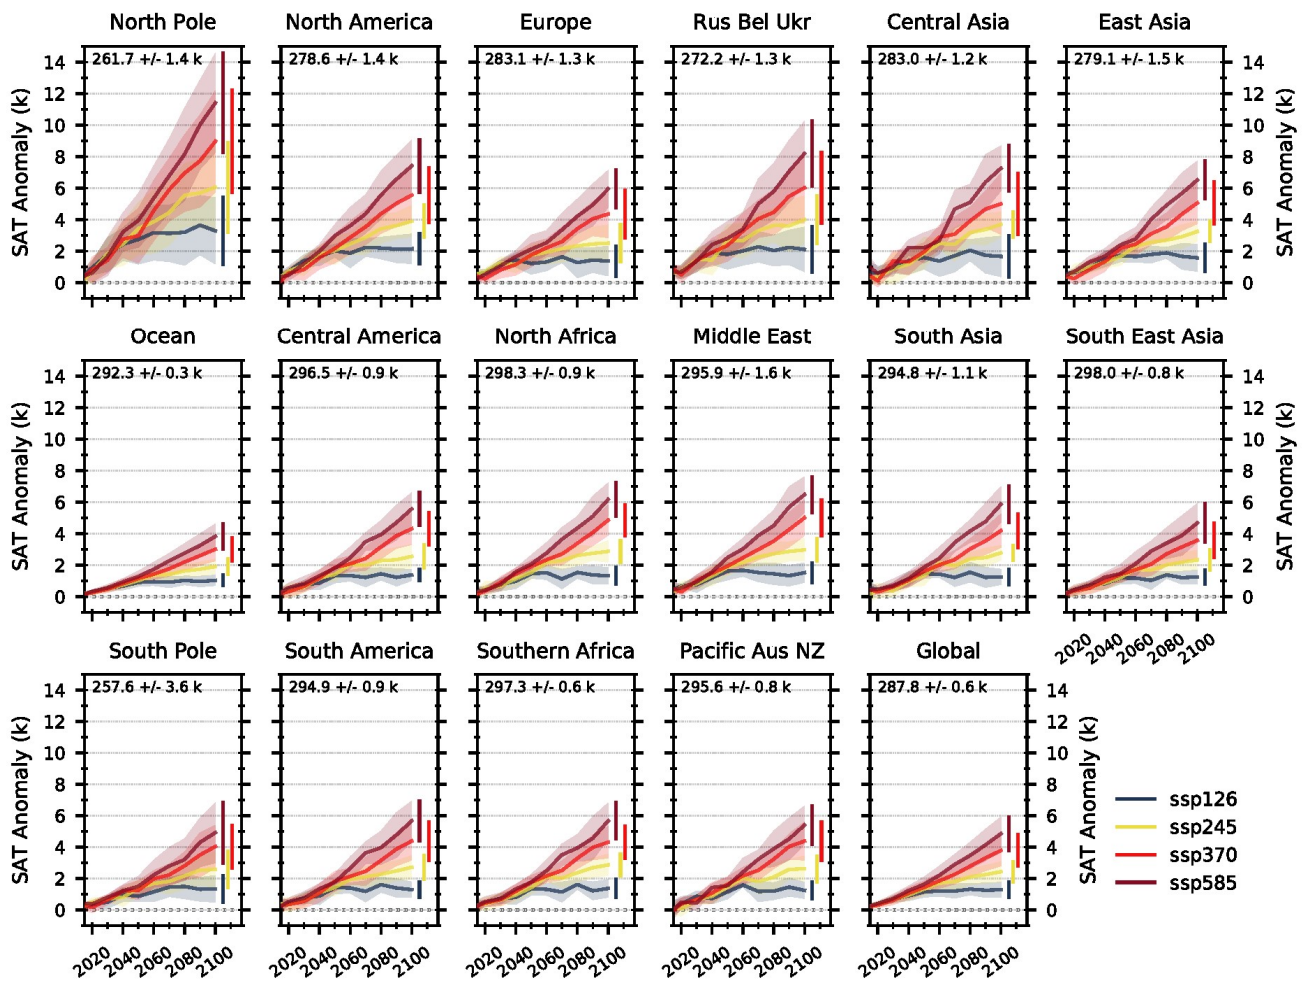

70 Figure S13 – Regional surface air temperature response across 5 CMIP6 models (CESM2-WACCM, CNRM-ESM2-1, GFDL-ESM4, MIROC-ES2L and UKESM1) for the Tier 1 future scenarios. Each line represents a multi-model mean across the region with shading representing the +/- 1 standard deviation in the mean. The multi-model regional mean value (+/- 1 standard deviation) for the year 2005-2014 is shown in the top left corner of each panel.



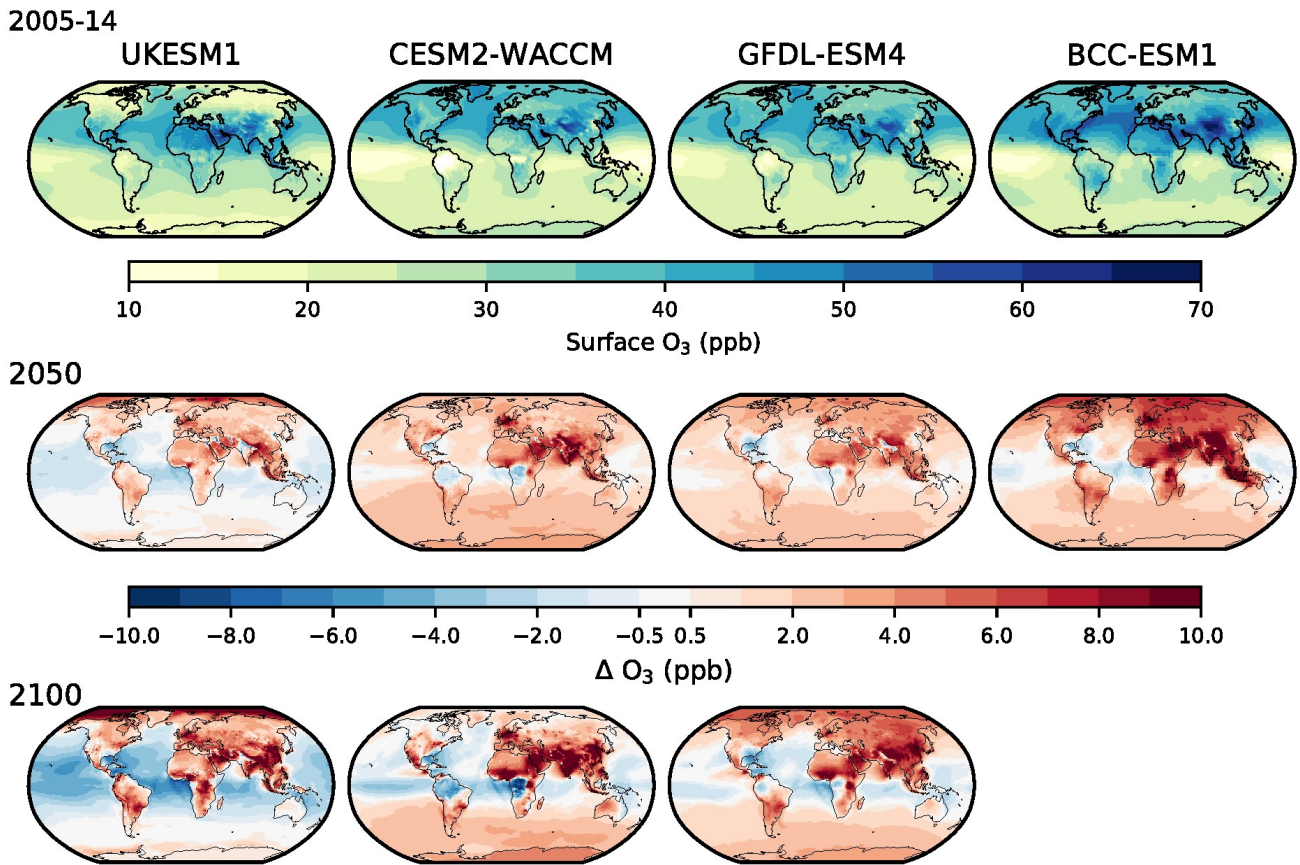

75 Figure S14 – Annual mean surface O<sub>3</sub> concentrations and future response in ssp370 across four different CMIP6 models. Top row shows the 2005-2014 annual mean surface O<sub>3</sub> concentrations in each model from the historical simulations. Middle row shows the surface O<sub>3</sub> response in 2050, relative to 2005-2014 mean, in each model for ssp370. Bottom row shows the same as the middle but for 2100. No data is presented in 2100 for BCC-ESM1 as data for ssp370 only extended out to 2055.

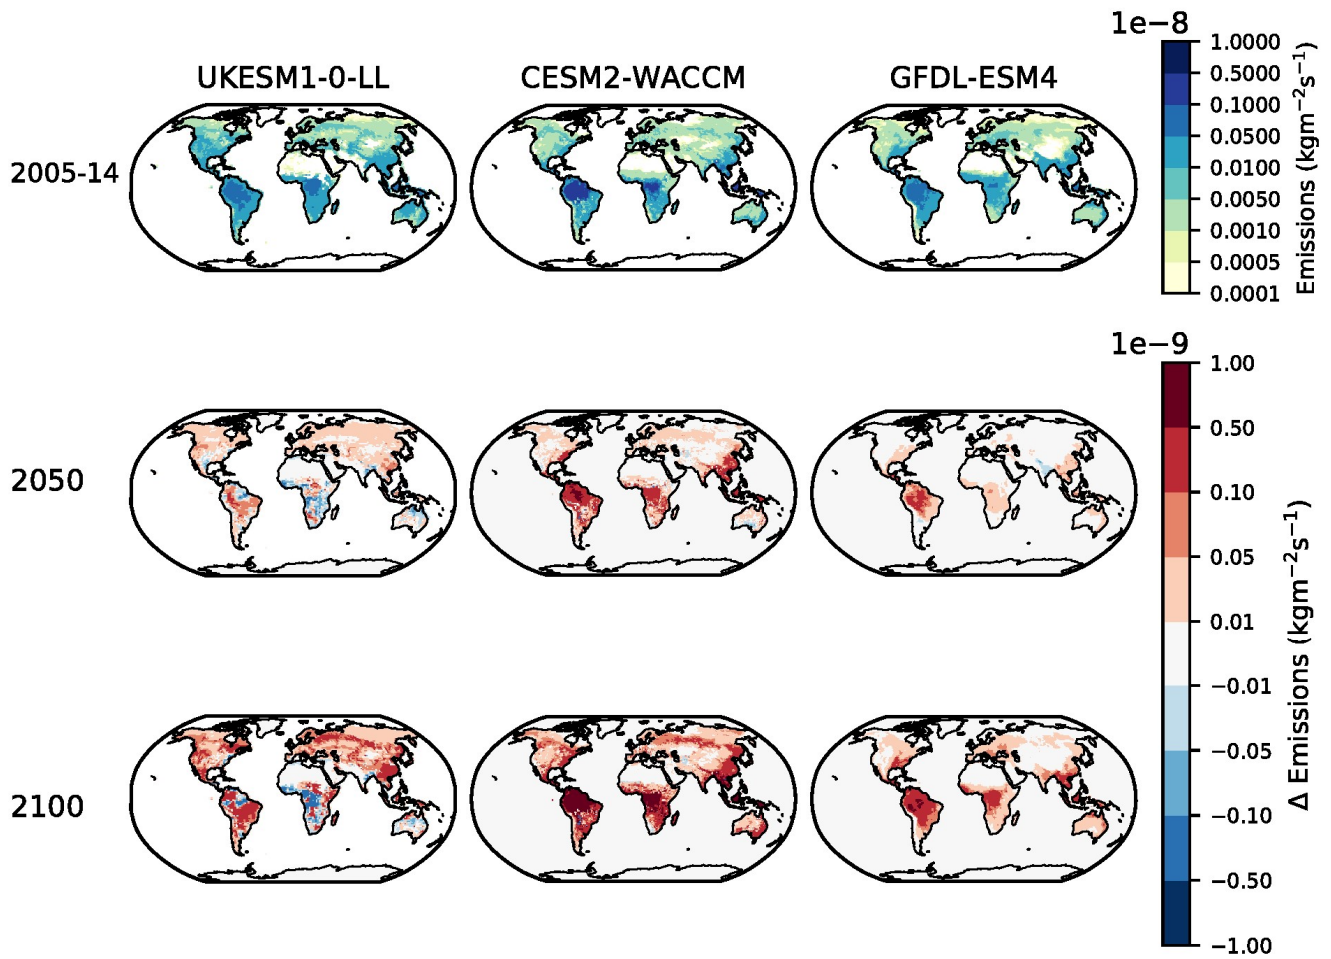

80 Figure S15 – Annual mean emissions of total biogenic volatile organic compounds across CMIP6 models. Top row shows the 2005-2014 annual mean emissions in each model from the historical simulations. Middle row shows 2050 change in emissions, relative to 2005-2014 mean, in each model for ssp370. Bottom row shows the same as the middle but for 2100.

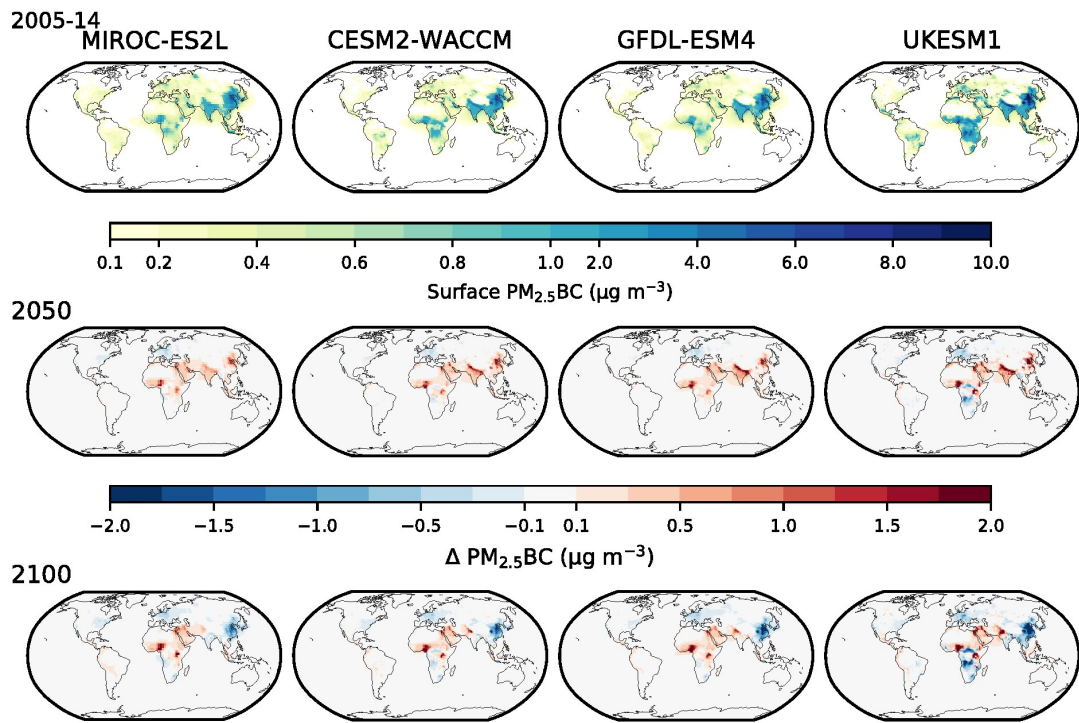

Figure S16 – Annual mean surface PM<sub>2.5</sub> black carbon concentrations and future response in ssp370 across four different CMIP6 models. Top row shows the 2005-2014 annual mean surface PM<sub>2.5</sub> black carbon concentrations in each model from the historical simulations. Middle row shows the decadal mean surface PM<sub>2.5</sub> black carbon response in 2050 (2045-2055), relative to 2005-2014 mean, in each model for ssp370. Bottom row shows the same as the middle but for 2095 (2090-2100).

85

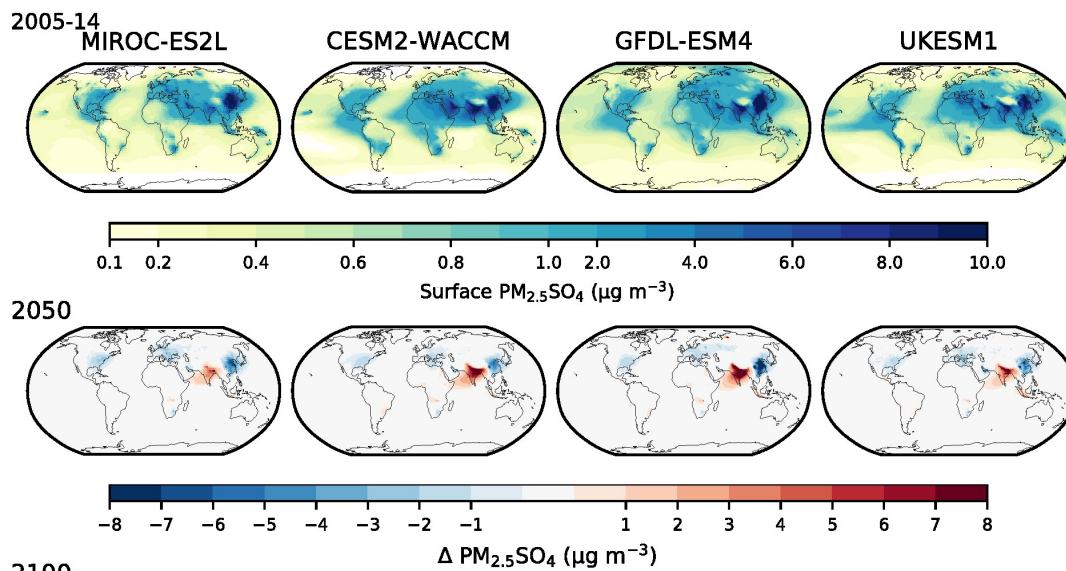

Figure S17 – same as Fig S16 but for  $PM_{2.5}$  sulphate

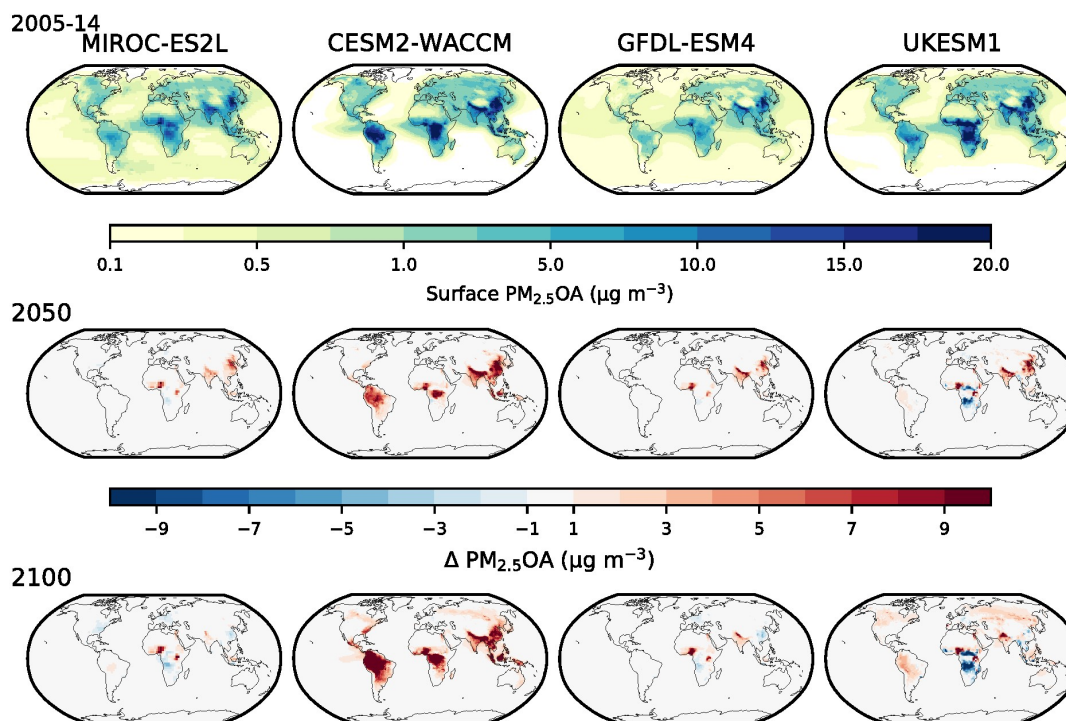

90 Figure S18 – same as Fig S16 but for  $PM_{2.5}$  organic aerosol

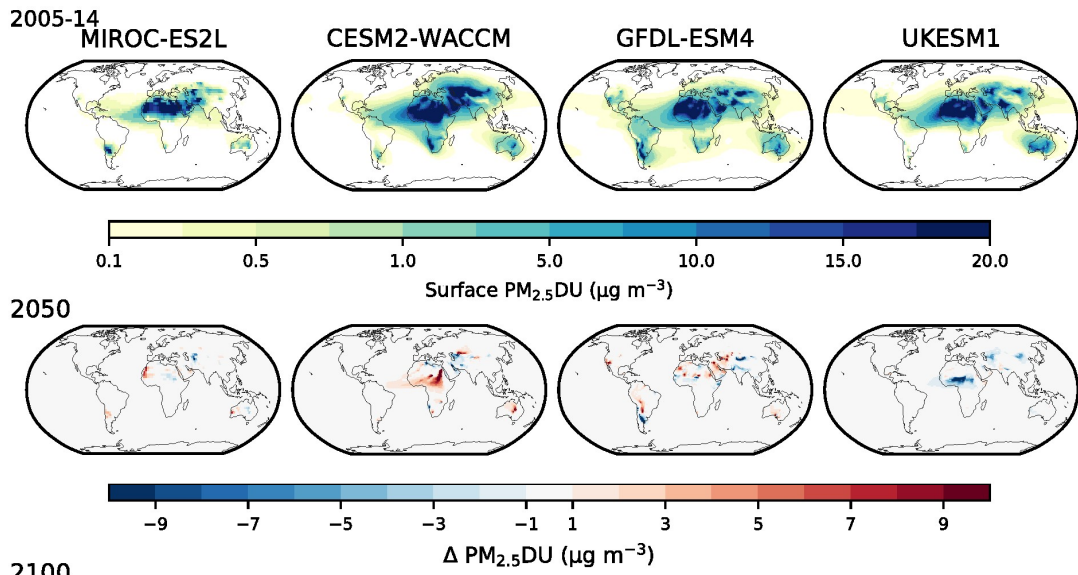

Figure S19 – same as Fig S16 but for  $PM_{2.5}$  dust

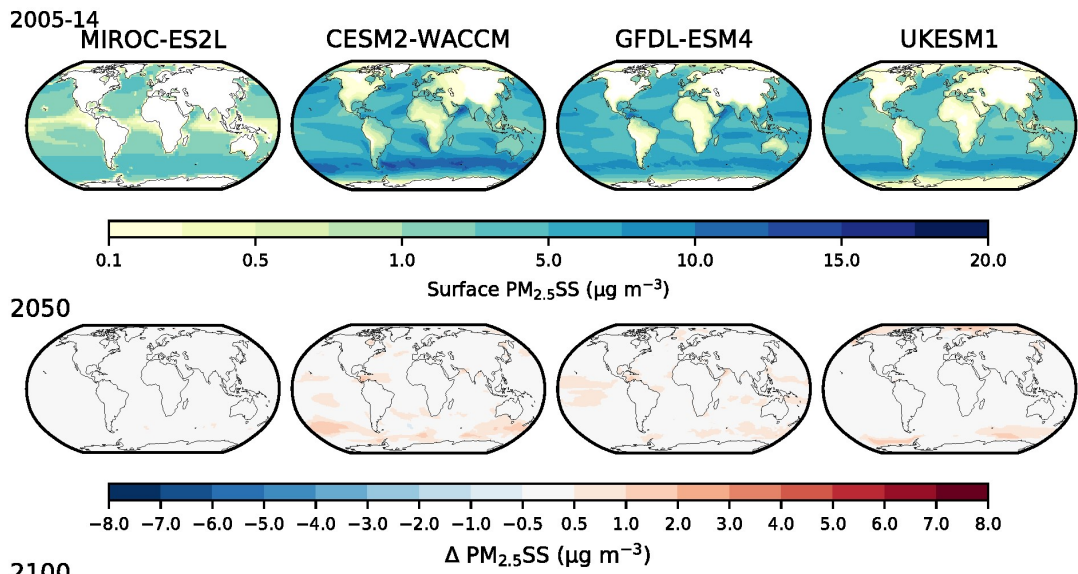

Figure S20 – same as Fig S16 but for  $PM_{2.5}$  sea salt
